# Supplementary material
Source: PubMed Central journal article supplement (PMC3398786)
Supplement: 97320630008543S1.pdf [file 97320630008543S1.pdf]

## Supplementary material:

**Table 1:** RMSD matrix showing the values generated from super imposition of kinase domains of HKs by MATRAS tool. The values are the determinants of identity among kinase domains of four HKs.

|            |              |              |              |              |
|------------|--------------|--------------|--------------|--------------|
| <b>HK1</b> | <b>0.000</b> | <b>0.588</b> | <b>0.674</b> | <b>0.650</b> |
| <b>HK2</b> | <b>0.588</b> | <b>0.000</b> | <b>0.233</b> | <b>0.520</b> |
| <b>HK3</b> | <b>0.674</b> | <b>0.233</b> | <b>0.000</b> | <b>0.561</b> |
| <b>HK4</b> | <b>0.650</b> | <b>0.520</b> | <b>0.561</b> | <b>0.000</b> |

**Table 2:** Molecular docking of ATP into the kinase domains of HKs

| Hexokinase | Docking score | No. of H-Bonds | Interacting residues | H-bond length (Å) |
|------------|---------------|----------------|----------------------|-------------------|
| HK1        | -12.417       | 6              | G170                 | 2.6               |
|            |               |                | K621                 | 3.0               |
|            |               |                | S682                 | 2.8               |
|            |               |                | S682                 | 2.8               |
|            |               |                | S682                 | 2.9               |
|            |               |                | E742                 | 2.9               |
| HK2        | -12.2306      | 3              | H504                 | 2.4               |
|            |               |                | Q608                 | 2.8               |
|            |               |                | N609                 | 2.5               |
| HK3        | -12.6445      | 5              | T626                 | 2.2               |
|            |               |                | R520                 | 3.0               |
|            |               |                | L623                 | 2.7               |
|            |               |                | N624                 | 2.6               |
|            |               |                | N624                 | 2.9               |
| HK4        | -13.1834      | 2              | H156                 | 1.8               |
|            |               |                | E157                 | 2.5               |
